# Supplementary material
Source: PubMed Central journal article supplement (PMC10713090)
Supplement: NIHMS1940451-supplement-1.pdf [file NIHMS1940451-supplement-1.pdf]

596

## SUPPORTING INFORMATION

597

### 598 **Photochemical Model Assessment of Single Source NO<sub>2</sub> and O<sub>3</sub> Plumes Using** 599 **Field Study Data**

600

601 Kirk R. Baker, U.S. Environmental Protection Agency, Research Triangle Park, North Carolina, USA

602 Lukas Valin, U.S. Environmental Protection Agency, Research Triangle Park, North Carolina, USA

603 Jim Szykman, U.S. Environmental Protection Agency, Research Triangle Park, North Carolina, USA

604 Laura Judd, NASA Langley Research Center, Hampton, Virginia, USA

605 Qian Shu, U.S. Environmental Protection Agency, Research Triangle Park, North Carolina, USA

606 Bill Hutzell, U.S. Environmental Protection Agency, Research Triangle Park, North Carolina, USA

607 Sergey Napelenok, U.S. Environmental Protection Agency, Research Triangle Park, North Carolina, USA

608 Ben Murphy, U.S. Environmental Protection Agency, Research Triangle Park, North Carolina, USA

609 Vickie Connors, Virginia Commonwealth University, Richmond, VA, USA

610

611

612 Table S-1. Models and source attribution options used for each case study. The grid resolution is also  
 613 noted for each combination of model and source attribution approach.

614

| <b>Case Study</b> | <b>Brute-Force Sensitivity</b> | <b>Source Apportionment</b>                | <b>DDM</b> |
|-------------------|--------------------------------|--------------------------------------------|------------|
| Hopewell          | CMAQ 12, 4, 2, and 1 km        | CMAQ ISAM option 1, 2, 3, 4, and 5 at 2 km | CMAQ 2 km  |
|                   | CAMx 2 km                      | CAMx OSAT and APCA at 2 km                 |            |
| TVA               | CMAQ 2 km                      | CMAQ ISAM option 1, 2, 3, 4, and 5 at 2 km | CMAQ 2 km  |
|                   | CAMx 2 km                      | CAMx OSAT and APCA at 2 km                 |            |
| Edgewater         | CMAQ 4, 2, and 1 km            |                                            |            |

615

616

617

618

619 Table S-2. A description of the various ISAM options available in the CMAQ model. Option 5 was a  
 620 combination of option 2 for NO<sub>2</sub> limited conditions and option 4 for VOC limited conditions. This table  
 621 also includes species used to influence source attribution for each option.

622

```

INTEGER :: ISAM_SPC_BIAS = 2      ! which chemistry are biased in apportioning reaction yields
                                  ! to source reactant
                                  ! 1 for none so divided equally between sources' reactant
                                  ! 2 for all products apportioned to sources with NO, NO2, NO3, HONO, ANO3
                                  !   -equally if reactants are neither or both
                                  ! 3 for all products apportioned to sources with Case 2 plus HCHO, CH3CHO,
                                  ! Acetone, Lumped Ketones, Isoprene peroxy radical, acetyl peroxy radical and peroxy
                                  ! radical operators (XO2 and XO2H)
                                  !   -equally if reactants are neither or both
                                  ! 4 for all products apportioned to sources with HCHO, CH3CHO,
                                  ! Acetone, Lumped Ketones, Isoprene peroxy radical, acetyl peroxy radicals and peroxy
                                  ! radical operators (XO2 and XO2H)
                                  !   -equally if reactants are neither or both
                                  ! 5 to switch between Cases 2 and 3 based on whether
                                  ! production H2O2 over production HNO3 less than VOC_NOX_TRANS that
                                  ! has default value of 0.35

REAL :: VOC_NOX_TRANS = 0.35     ! H2O2 to HNO3 marking transition from NOx to VOC limiting O3 production
  
```

|                                  | Option 1, | Option 2, | Option 3, | Option 4, | Option 5                                       |
|----------------------------------|-----------|-----------|-----------|-----------|------------------------------------------------|
| NO,                              | NO,       | YES,      | YES,      | NO,       | IF( PH2O2/PHNO3 > VOC_NOX_TRANS){YES}else{YES} |
| NO2,                             | NO,       | YES,      | YES,      | NO,       | IF( PH2O2/PHNO3 > VOC_NOX_TRANS){YES}else{YES} |
| NO3,                             | NO,       | YES,      | YES,      | NO,       | IF( PH2O2/PHNO3 > VOC_NOX_TRANS){YES}else{YES} |
| HONO,                            | NO,       | YES,      | YES,      | NO,       | IF( PH2O2/PHNO3 > VOC_NOX_TRANS){YES}else{YES} |
| ANO3[i,j],                       | NO,       | YES,      | YES,      | NO,       | IF( PH2O2/PHNO3 > VOC_NOX_TRANS){YES}else{YES} |
| HCHO,                            | NO,       | NO,       | YES,      | YES,      | IF( PH2O2/PHNO3 > VOC_NOX_TRANS){ NO}else{YES} |
| CH3CHO,                          | NO,       | NO,       | YES,      | YES,      | IF( PH2O2/PHNO3 > VOC_NOX_TRANS){ NO}else{YES} |
| Acetone,                         | NO,       | NO,       | YES,      | YES,      | IF( PH2O2/PHNO3 > VOC_NOX_TRANS){ NO}else{YES} |
| Lumped Ketones,                  | NO,       | NO,       | YES,      | YES,      | IF( PH2O2/PHNO3 > VOC_NOX_TRANS){ NO}else{YES} |
| Isoprene peroxy radical,         | NO,       | NO,       | YES,      | YES,      | IF( PH2O2/PHNO3 > VOC_NOX_TRANS){ NO}else{YES} |
| Acetyl peroxy radicals,          | NO,       | NO,       | YES,      | YES,      | IF( PH2O2/PHNO3 > VOC_NOX_TRANS){ NO}else{YES} |
| peroxy operators (XO2 and XO2H), | NO,       | NO,       | YES,      | YES,      | IF( PH2O2/PHNO3 > VOC_NOX_TRANS){ NO}else{YES} |

623

624

625

626

627 Table S-3. Aggregated model performance metrics for chemically speciated PM<sub>2.5</sub> components made as  
 628 part of the Chemical Speciation Network (CSN).

| Specie                 | Network | N | Mean Bias<br>( $\mu\text{g}/\text{m}^3$ ) | Mean Error<br>( $\mu\text{g}/\text{m}^3$ ) | Normalized<br>Mean Bias (%) | Normalized<br>Mean Error (%) | $r^2$ |
|------------------------|---------|---|-------------------------------------------|--------------------------------------------|-----------------------------|------------------------------|-------|
| PM2.5 sulfate ion      | CSN     | 9 | -0.30                                     | 0.36                                       | -26.08                      | 31.66                        | 0.86  |
| PM2.5 nitrate ion      | CSN     | 9 | -0.14                                     | 0.14                                       | -88.61                      | 88.61                        | 0.67  |
| PM2.5 elemental carbon | CSN     | 9 | -0.11                                     | 0.13                                       | -29.16                      | 33.07                        | 0.26  |
| PM2.5 organic carbon   | CSN     | 9 | 0.41                                      | 0.52                                       | 15.72                       | 19.95                        | 0.87  |
| PM2.5 ammonium ion     | CSN     | 9 | -0.02                                     | 0.09                                       | -9.63                       | 35.69                        | 0.83  |

629

630

631

632

633 Table S-4. Aggregated model performance metrics for MDA8 O<sub>3</sub> for all model-observed pairs, a subset  
 634 where modeled values exceed 60 ppb, and a subset where observed values exceed 60 ppb.

| Specie | Network               | N   | Mean Bias<br>(ppb) | Mean Error<br>(ppb) | Normalized<br>Mean Bias (%) | Normalized<br>Mean Error (%) | $r^2$ |
|--------|-----------------------|-----|--------------------|---------------------|-----------------------------|------------------------------|-------|
| MDA8O3 | AIRS - ALL            | 385 | 7.12               | 7.68                | 15.58                       | 16.80                        | 0.65  |
| MDA8O3 | AIRS - Model > 60 ppb | 68  | 7.81               | 8.71                | 13.81                       | 15.40                        | 0.15  |
| MDA8O3 | AIRS - Obs. > 60 ppb  | 23  | -0.63              | 4.05                | -0.96                       | 6.22                         | 0.21  |

635

636

637

638

639

640 Figure S1. Map of area around Hopewell, Virginia, USA. Orange sources were included in the Hopewell  
641 complex. The VCU pandora location is also shown.

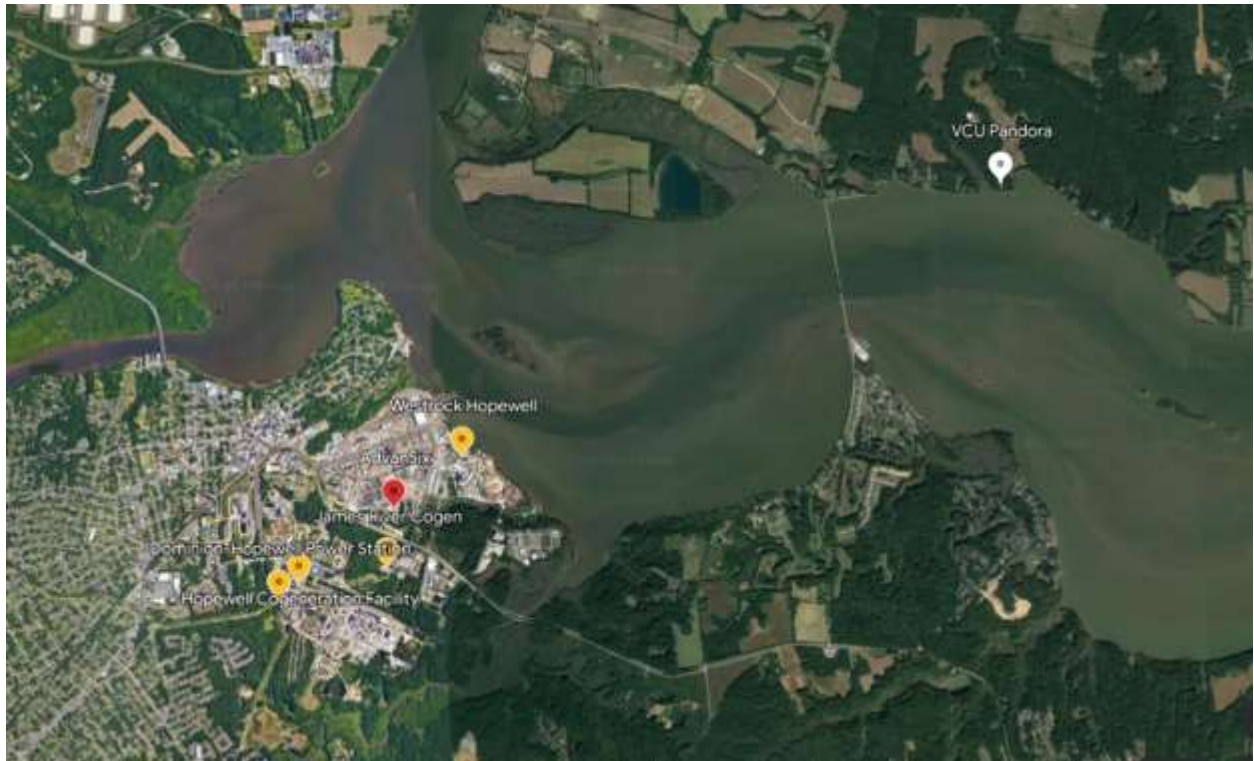

642

643 Figure S2. Modeled and measured O<sub>3</sub> and NO<sub>2</sub> in a plume downwind of the TVA Cumberland power  
644 plant during July 1999. Model predictions are shown for CAMx brute-force difference (zero-out) and  
645 each option in the CAMx source apportionment approach (OSAT and APCA).

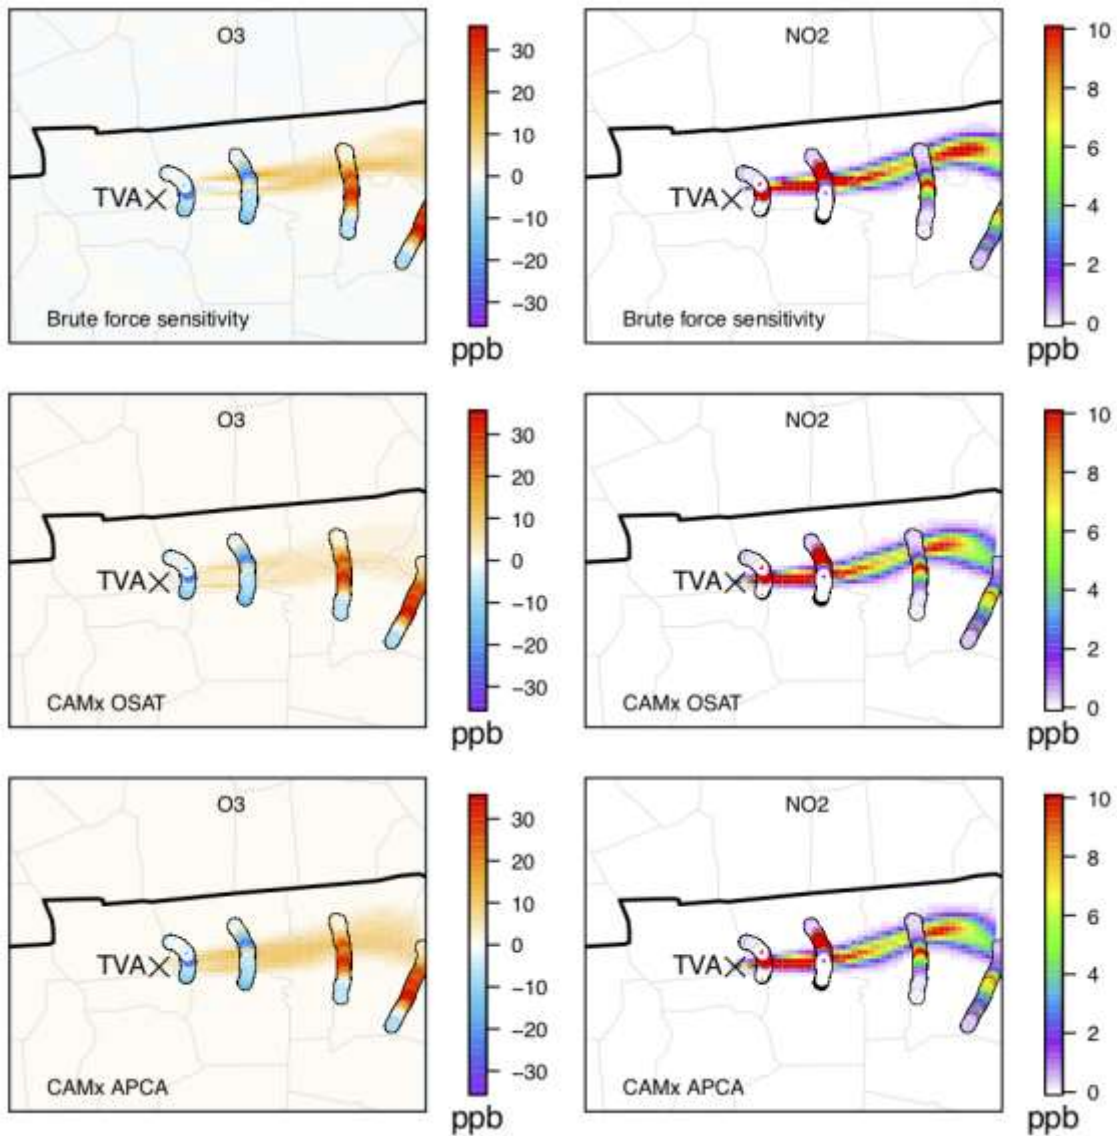

646

647

648

649 Figure S3. Aircraft altitude and distance from Hopewell for the July 19 and 20, 2017 flights.

650

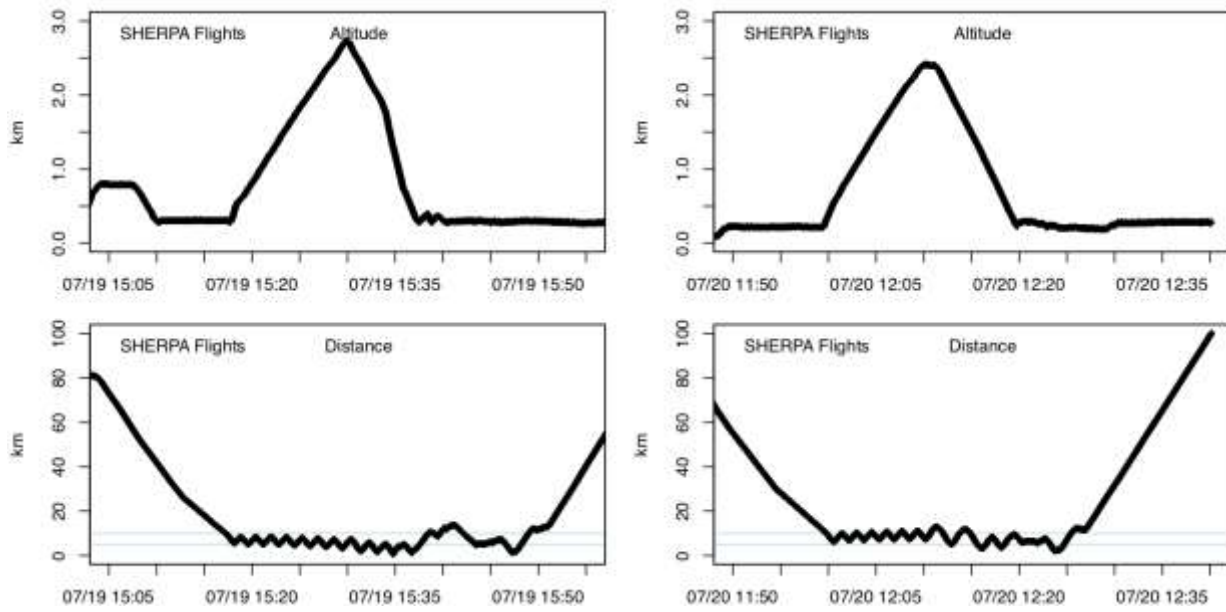

651

652

653 Figure S4. Daily prediction-observation pairs for speciated PM<sub>2.5</sub> components and MDA8 O<sub>3</sub>. Model  
654 predictions were extracted from the CMAQ 2 km simulation.

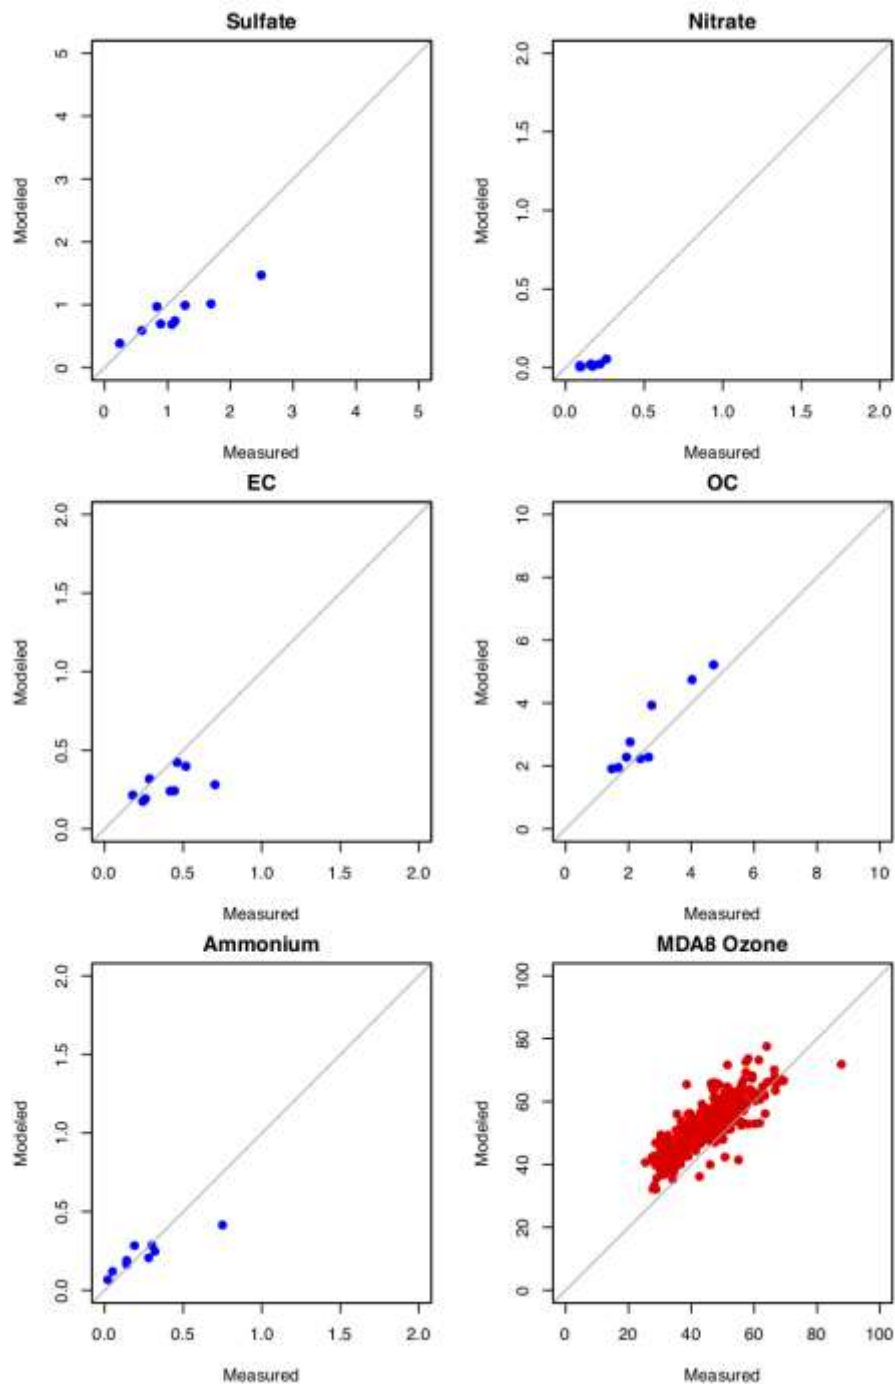

655

656

657

658



659 Figure S5. July 2017 episode average surface level 2 km modeled (CMAQ) primary and secondary  
660 pollutant impacts from Hopewell.

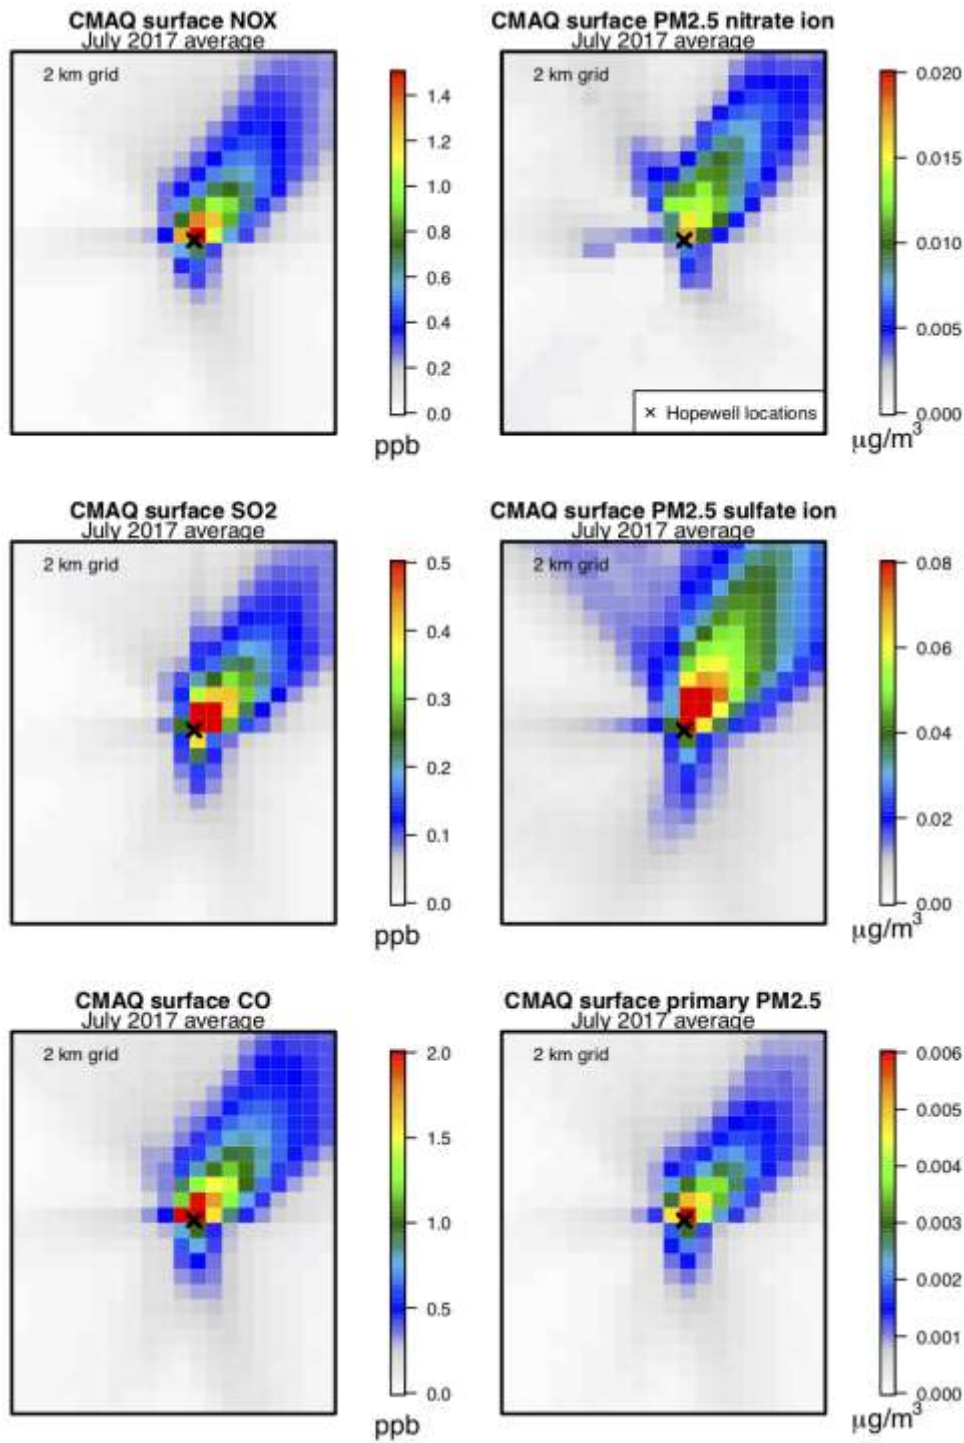

661

662

663 Figure S6. July 2017 episode average surface level 4 km modeled (CMAQ) primary and secondary  
664 pollutant impacts from Hopewell.

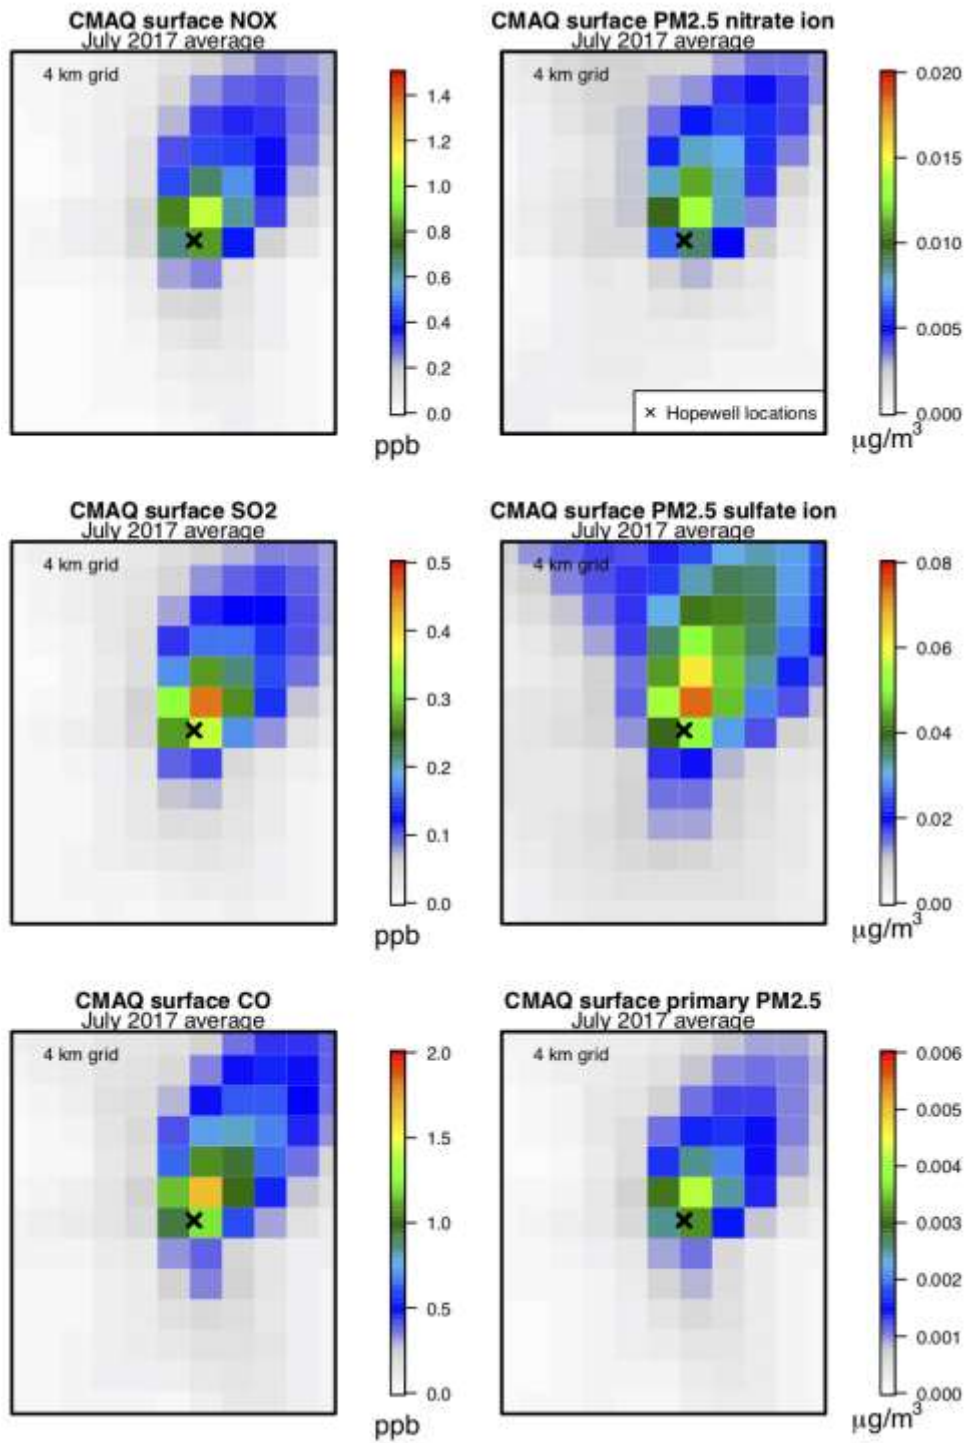

665

666

667 Figure S7. July 2017 episode average surface level 12 km modeled (CMAQ) primary and secondary  
668 pollutant impacts from Hopewell.

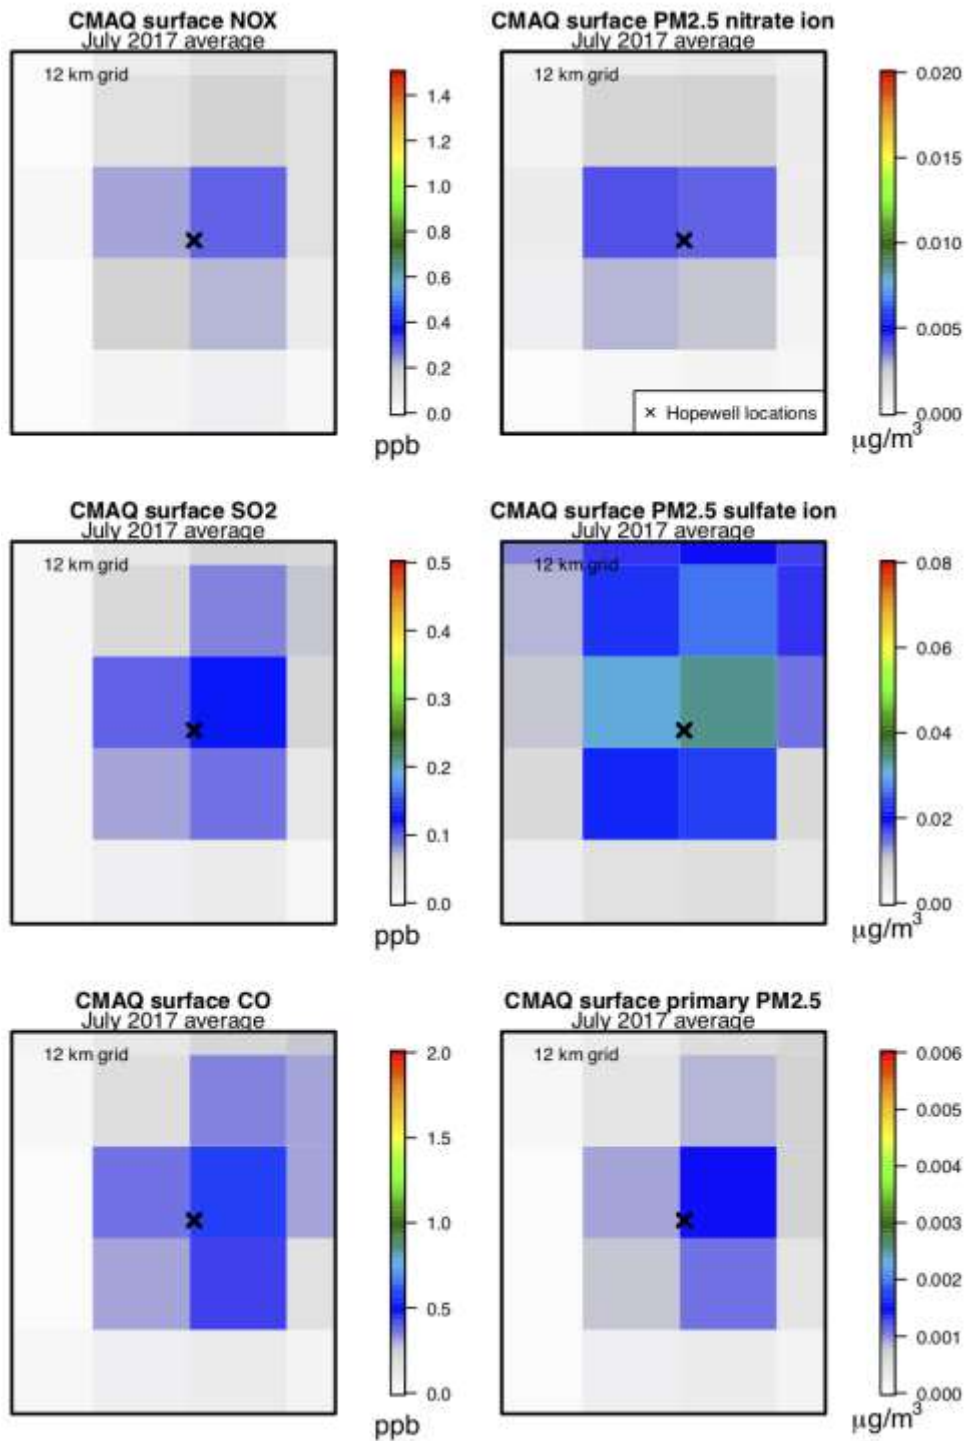

669

670

671 Figure S8. CMAQ 2 km (top panels) ISAM model OPTION 1 predicted surface level NO<sub>x</sub> at the time of the  
672 July 8, 2017 afternoon aircraft measurements. Open circles show the location of routine surface monitor  
673 sites in the area.

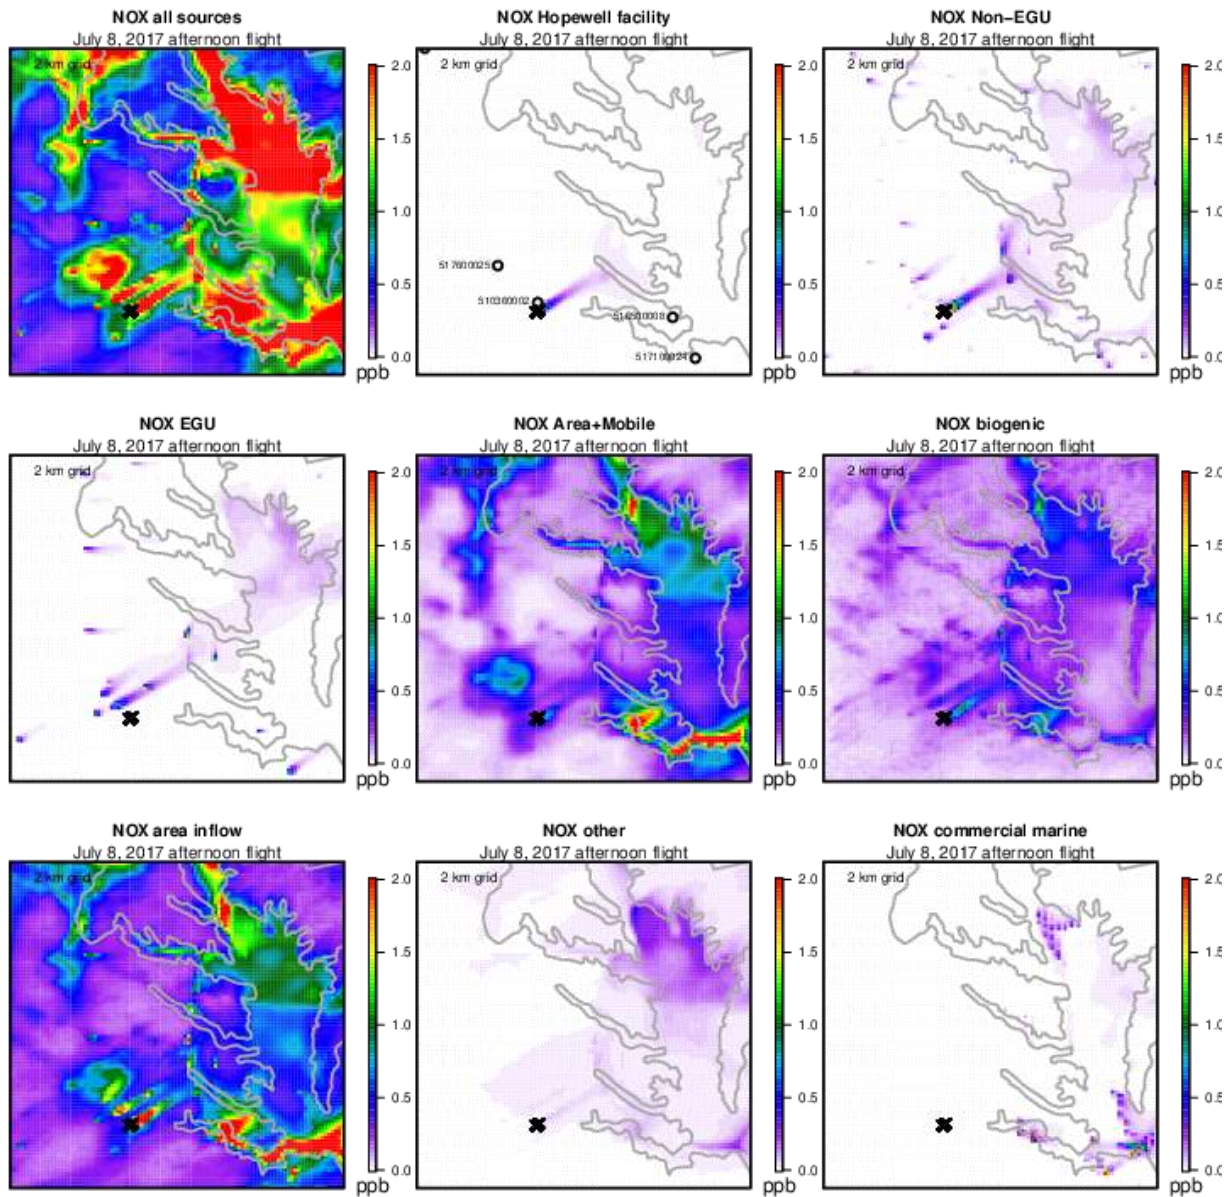

674

675

676

677 Figure S9. CMAQ 2 km (top panels) ISAM model OPTION 2 predicted surface level NO<sub>x</sub> at the time of the  
678 July 8, 2017 afternoon aircraft measurements. Open circles show the location of routine surface monitor  
679 sites in the area.

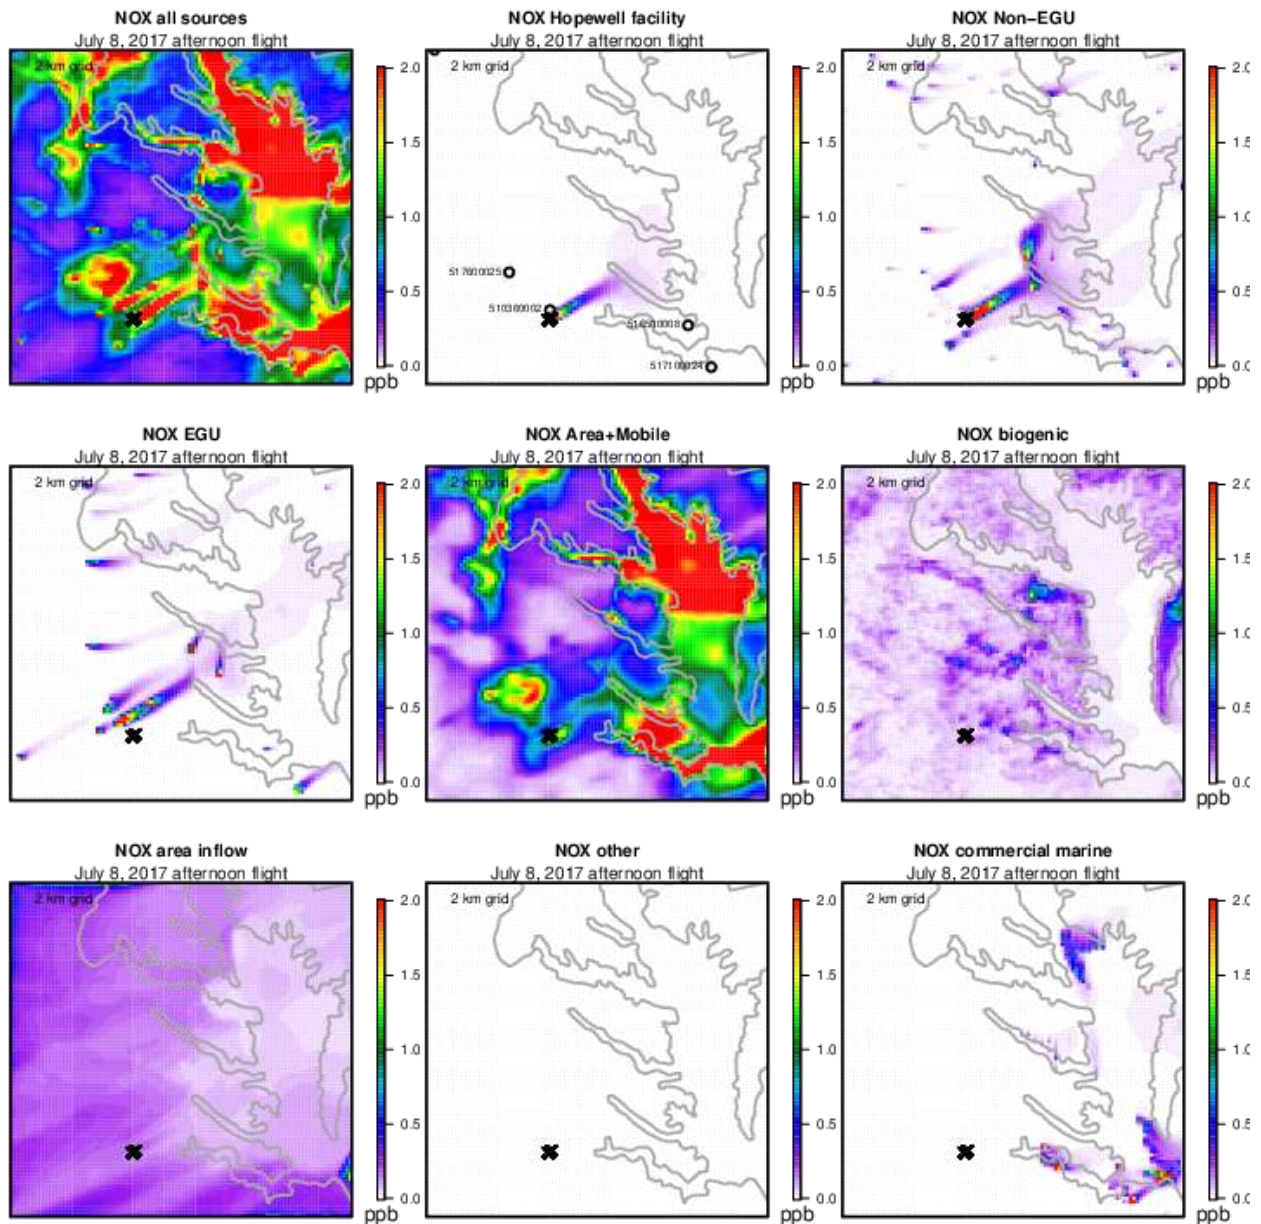

680

681

682

683 Figure S10. CMAQ 2 km (top panels) ISAM model OPTION 3 predicted surface level NO<sub>x</sub> at the time of  
684 the July 8, 2017 afternoon aircraft measurements. Open circles show the location of routine surface  
685 monitor sites in the area.

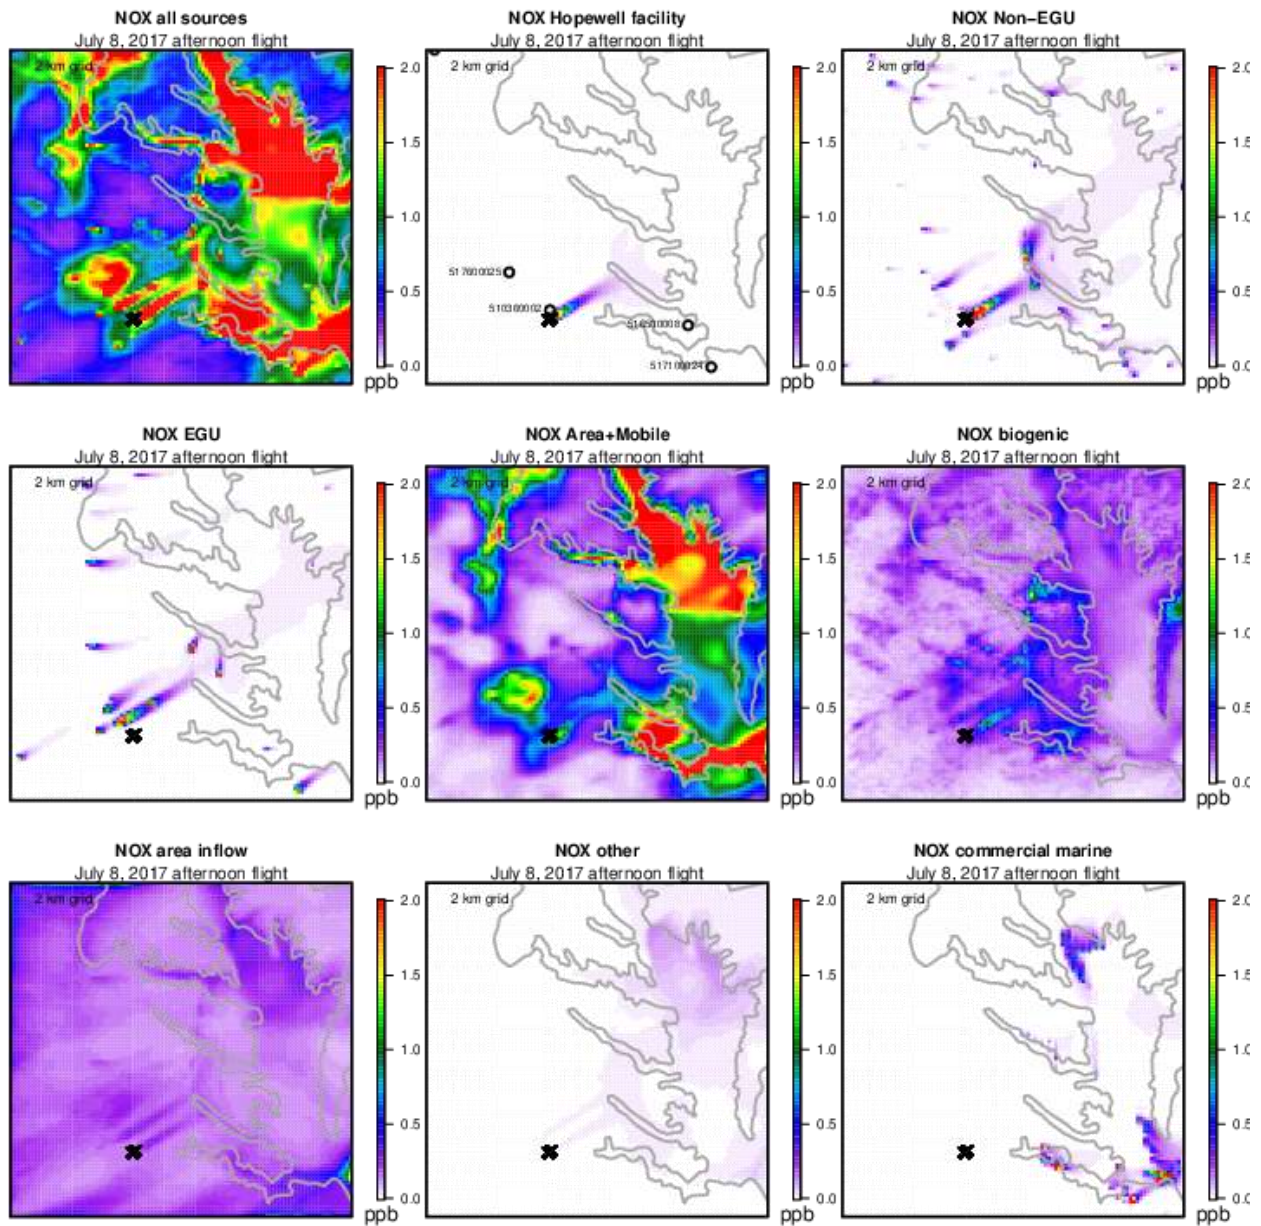

686  
687  
688  
689

690 Figure S11. CMAQ 2 km (top panels) ISAM model OPTION 4 predicted surface level NO<sub>x</sub> at the time of  
691 the July 8, 2017 afternoon aircraft measurements. Open circles show the location of routine surface  
692 monitor sites in the area.

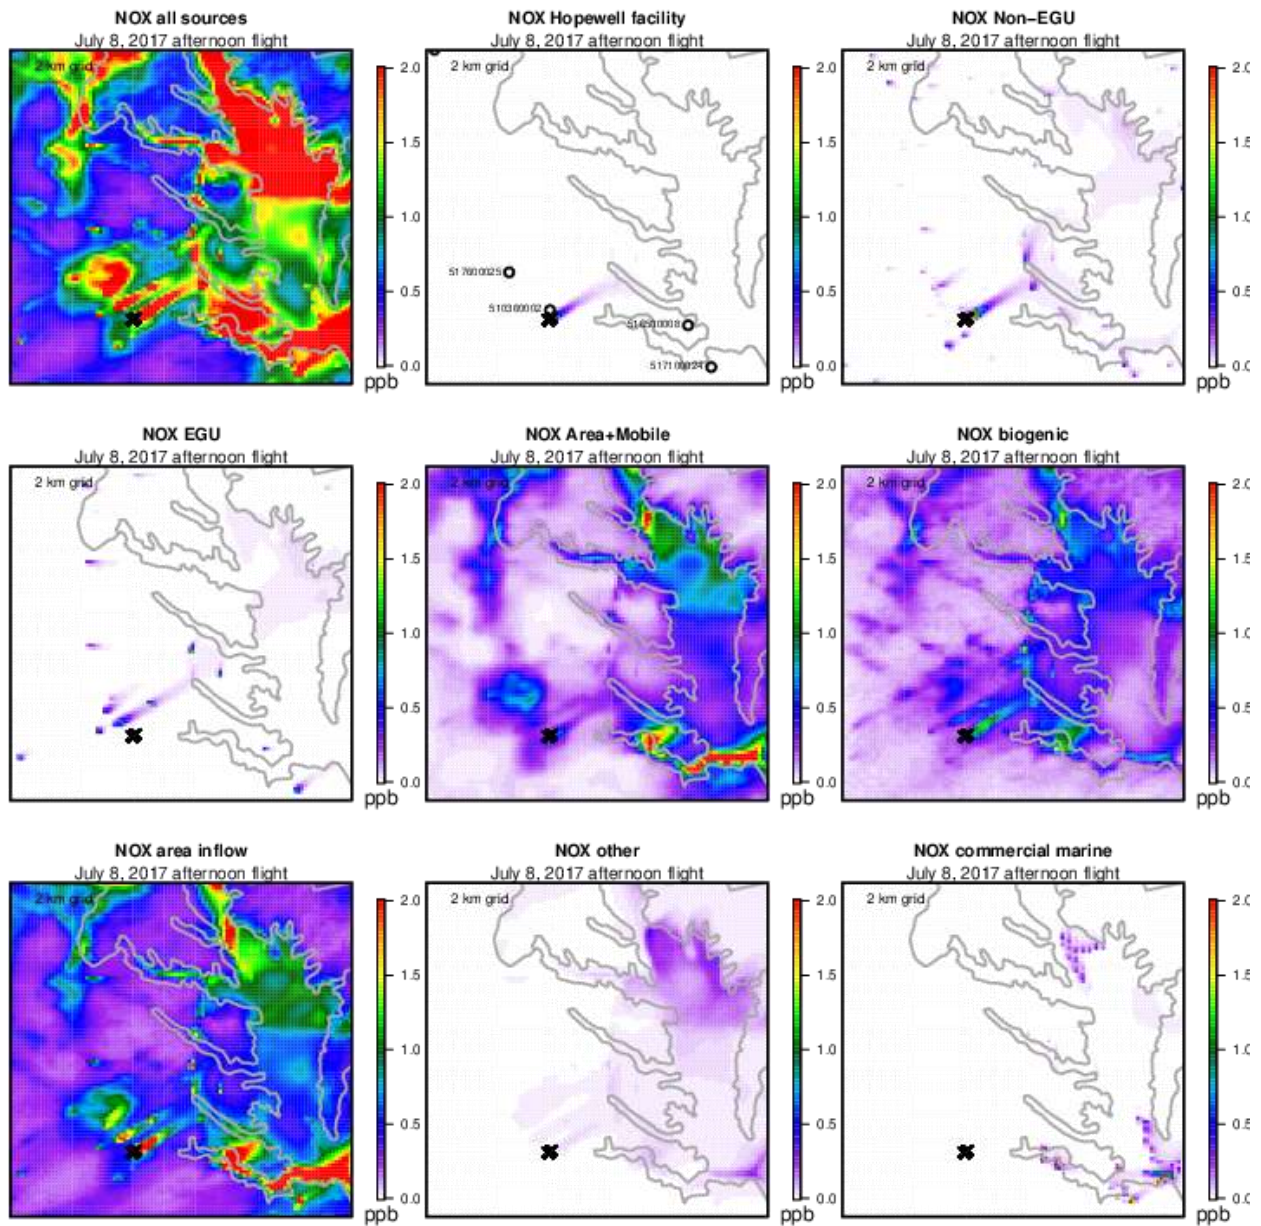

693

694

695

696 Figure S12. CMAQ 2 km (top panels) ISAM model OPTION 5 predicted surface level NO<sub>x</sub> at the time of  
697 the July 8, 2017 afternoon aircraft measurements. Open circles show the location of routine surface  
698 monitor sites in the area.

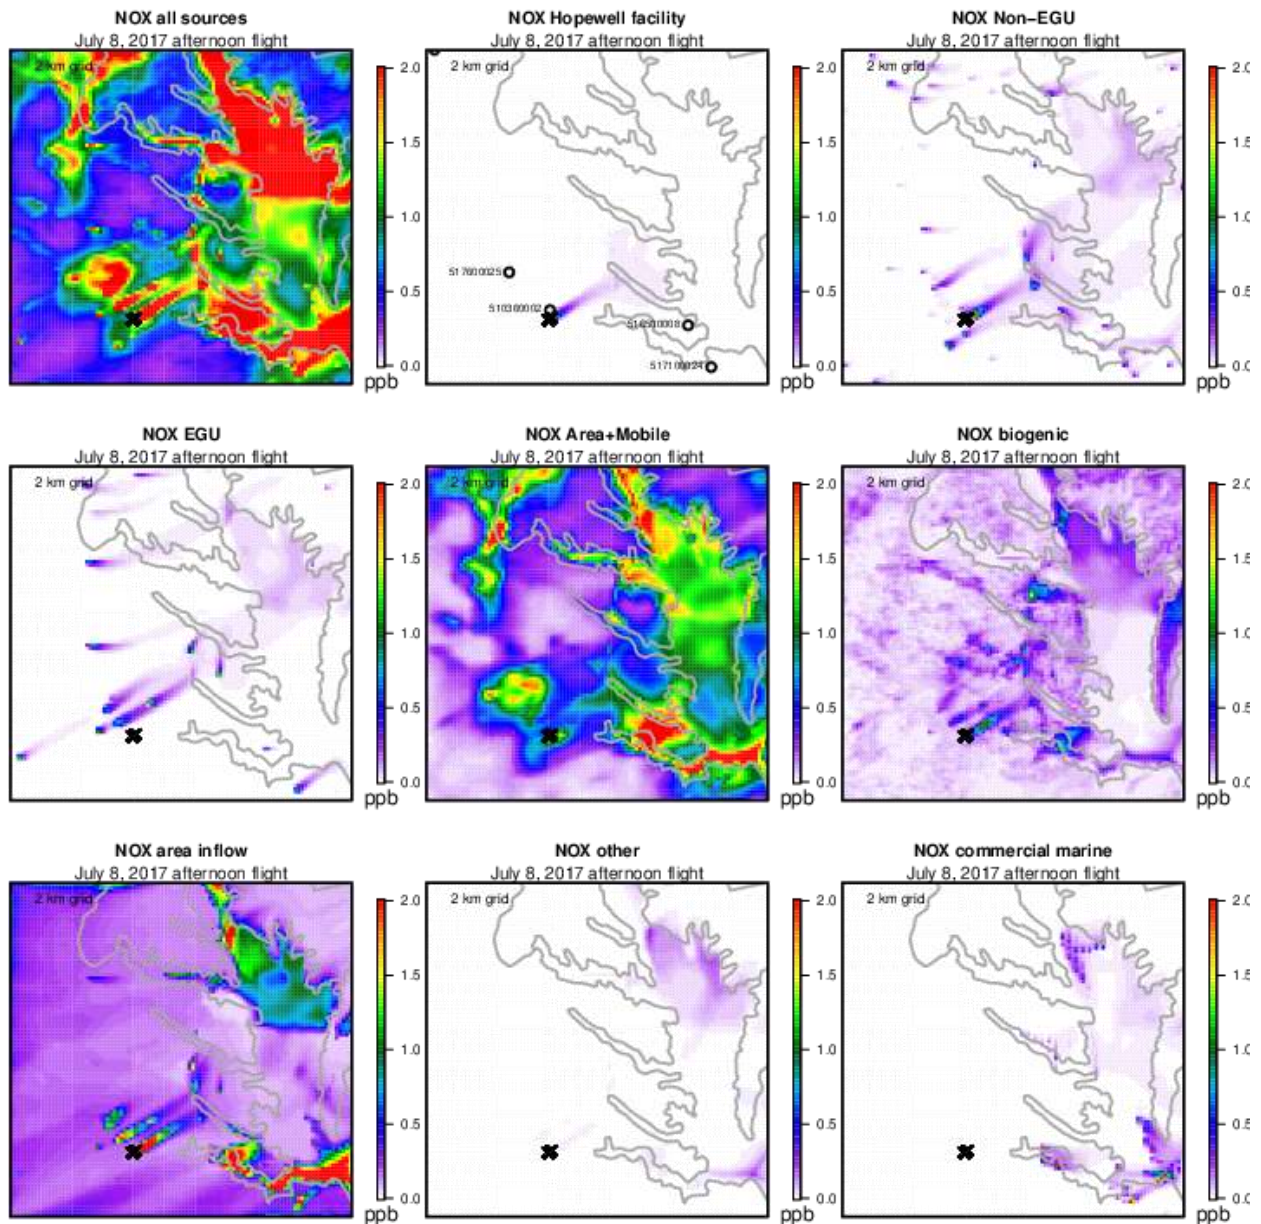

699  
700  
701



702 Figure S13. CMAQ 2 km (top panels) DDM model predicted surface level NO<sub>x</sub> at the time of the July 8,  
703 2017 afternoon aircraft measurements. Open circles show the location of routine surface monitor sites  
704 in the area.

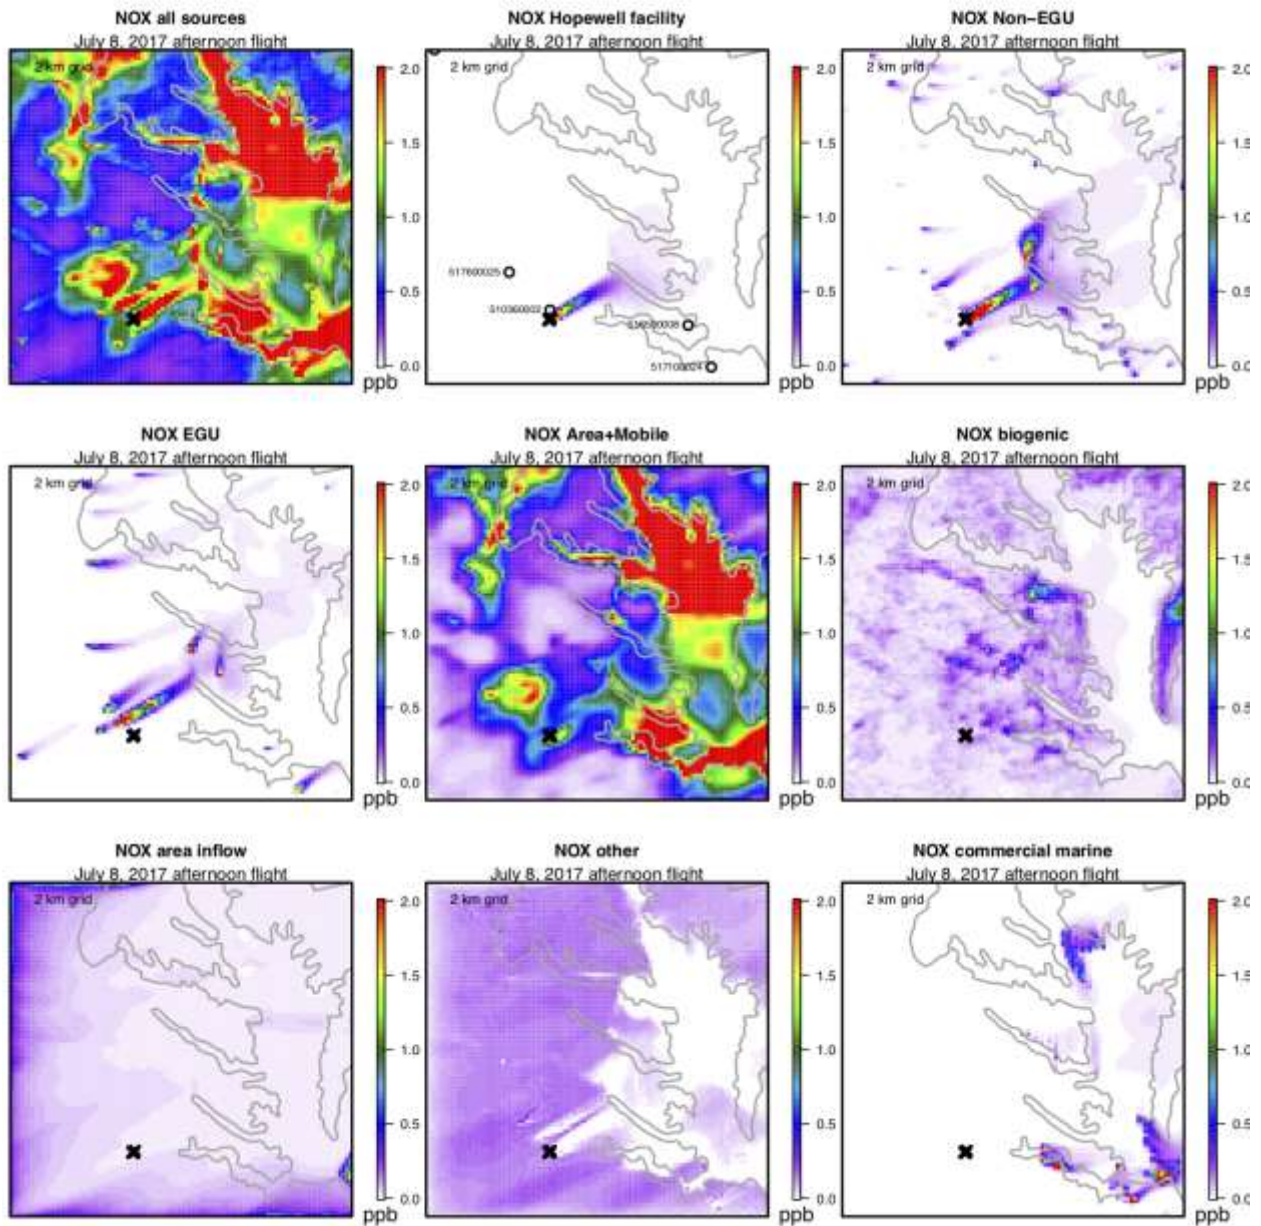

705  
706

707 Figure S14. CMAQ 2 km (top panels) ISAM model OPTION 1 predicted surface level O<sub>3</sub> at the time of the  
708 July 8, 2017 afternoon aircraft measurements. Open circles show the location of routine surface monitor  
709 sites in the area.

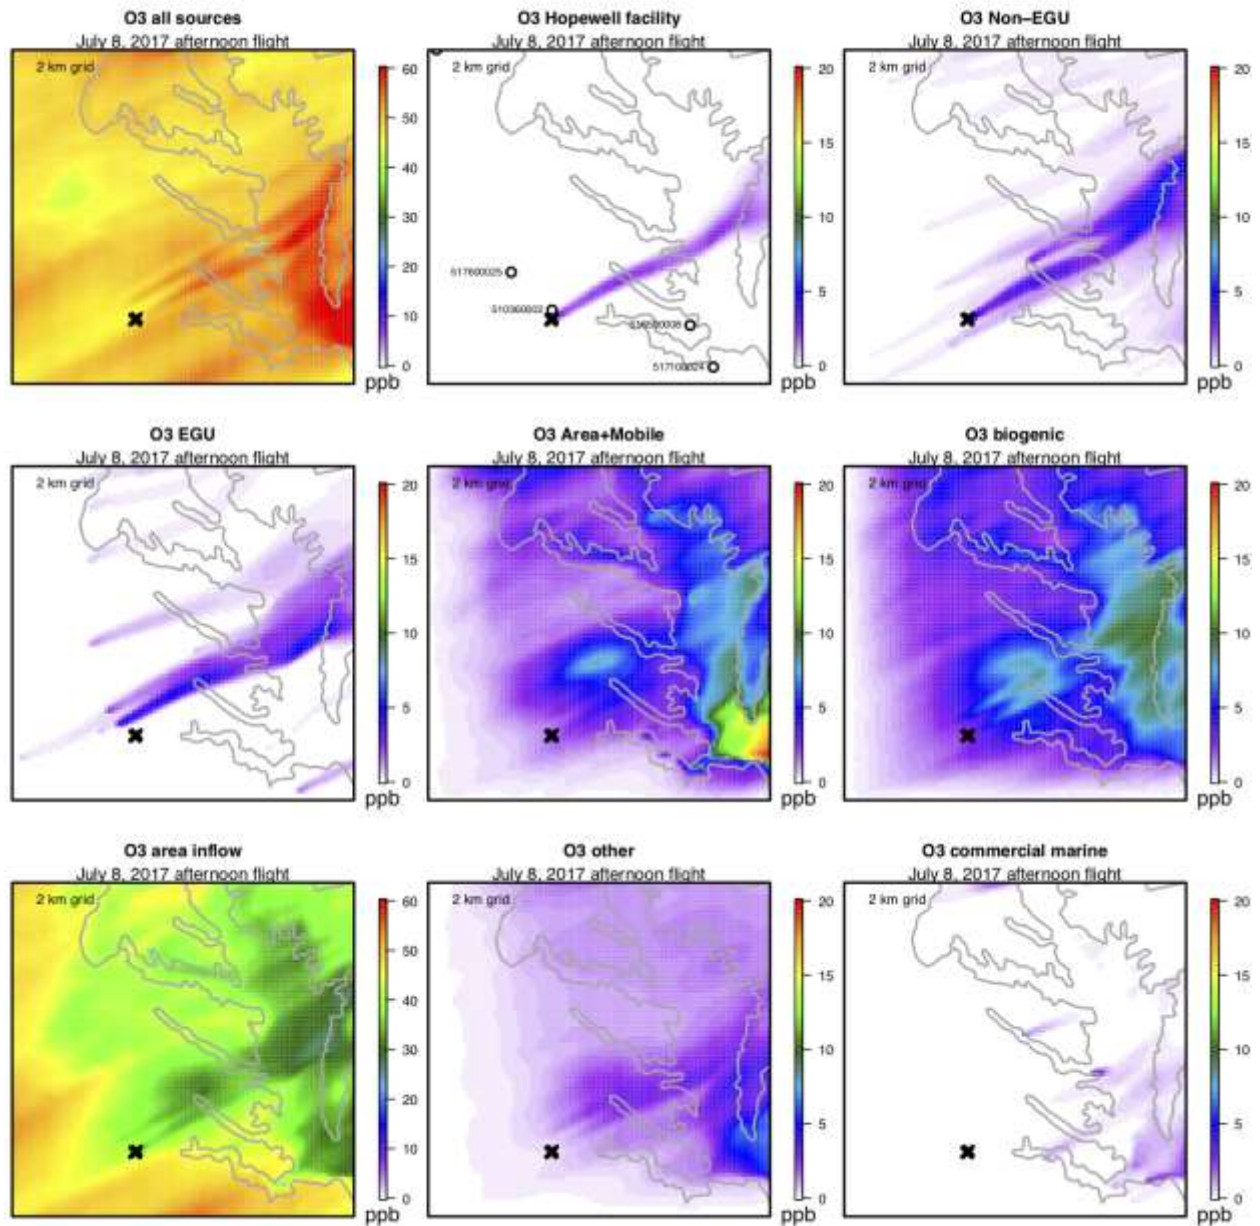

710

711

712

713

714 Figure S15. CMAQ 2 km (top panels) ISAM model OPTION 2 predicted surface level O<sub>3</sub> at the time of the  
715 July 8, 2017 afternoon aircraft measurements. Open circles show the location of routine surface monitor  
716 sites in the area.

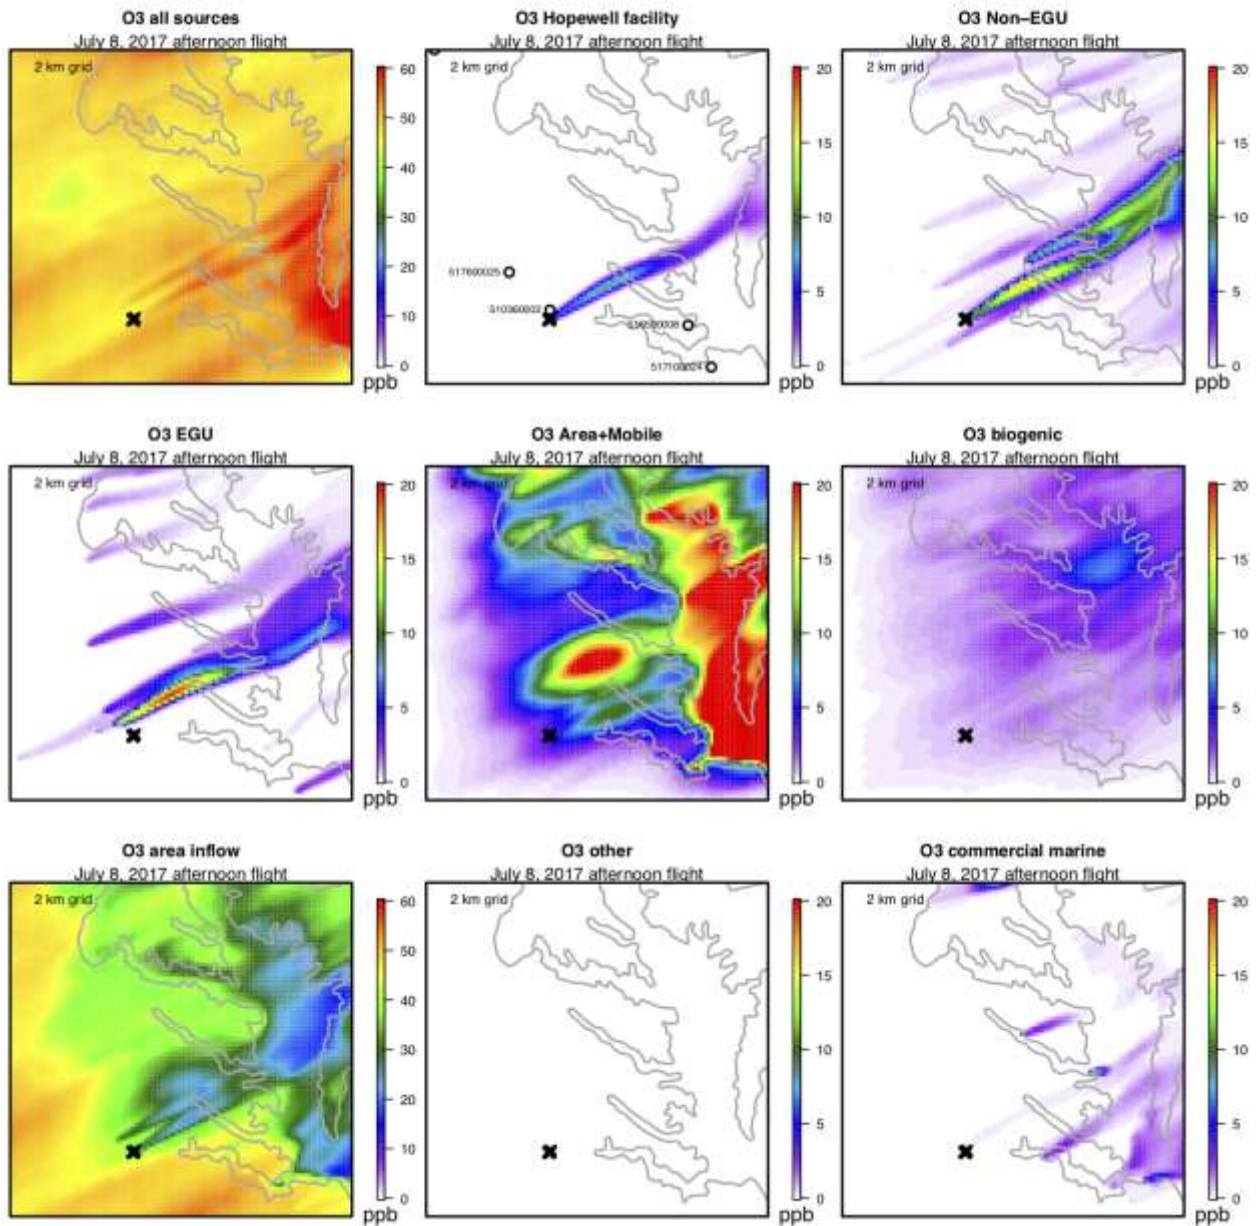

717

718

719

720

721

722 Figure S16. CMAQ 2 km (top panels) ISAM model OPTION 3 predicted surface level O<sub>3</sub> at the time of the  
723 July 8, 2017 afternoon aircraft measurements. Open circles show the location of routine surface monitor  
724 sites in the area.

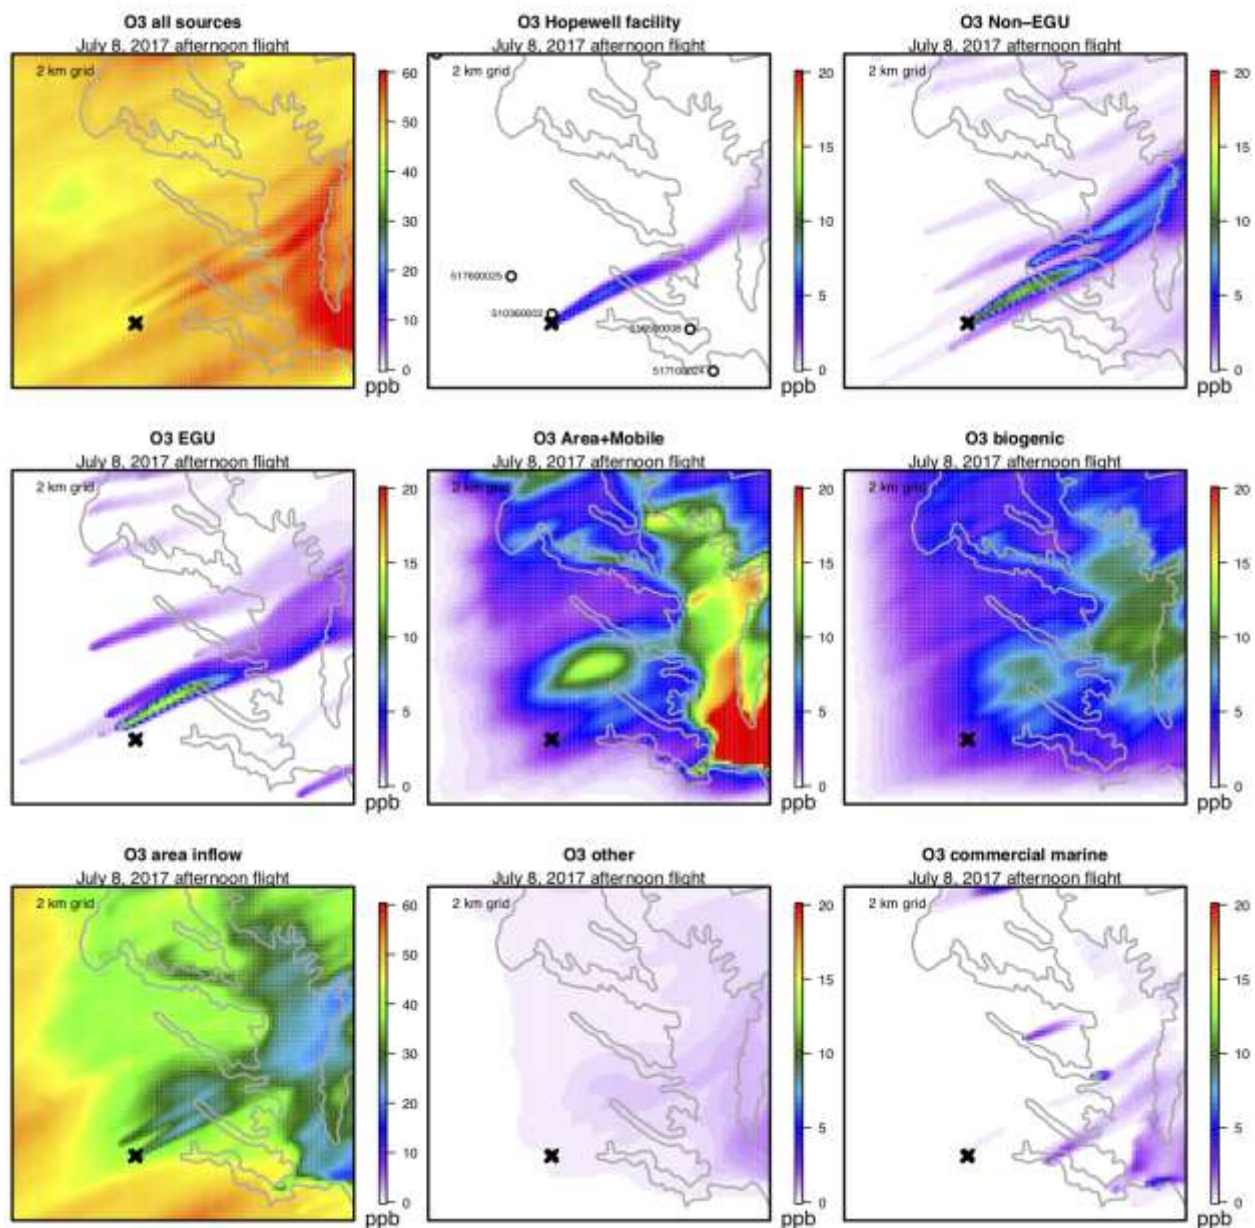

725

726

727

728 Figure S17. CMAQ 2 km (top panels) ISAM model OPTION 4 predicted surface level O<sub>3</sub> at the time of the  
729 July 8, 2017 afternoon aircraft measurements. Open circles show the location of routine surface monitor  
730 sites in the area.

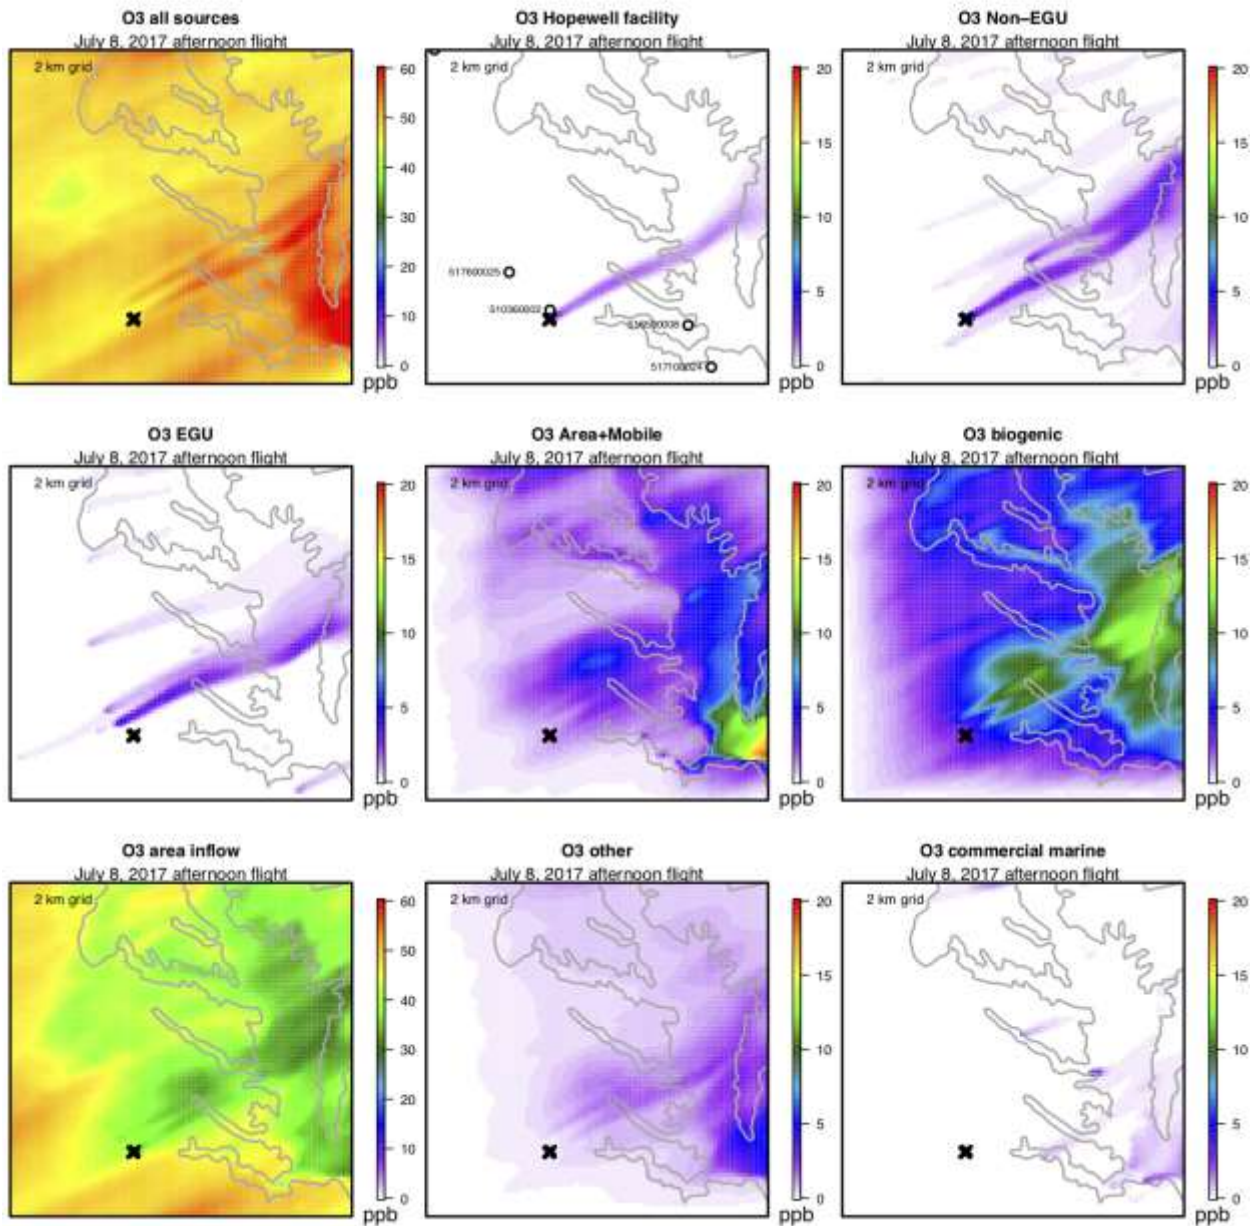

731

732

733

734

735 Figure S18. CMAQ 2 km (top panels) ISAM model OPTION 5 predicted surface level O<sub>3</sub> at the time of the  
736 July 8, 2017 afternoon aircraft measurements. Open circles show the location of routine surface monitor  
737 sites in the area.

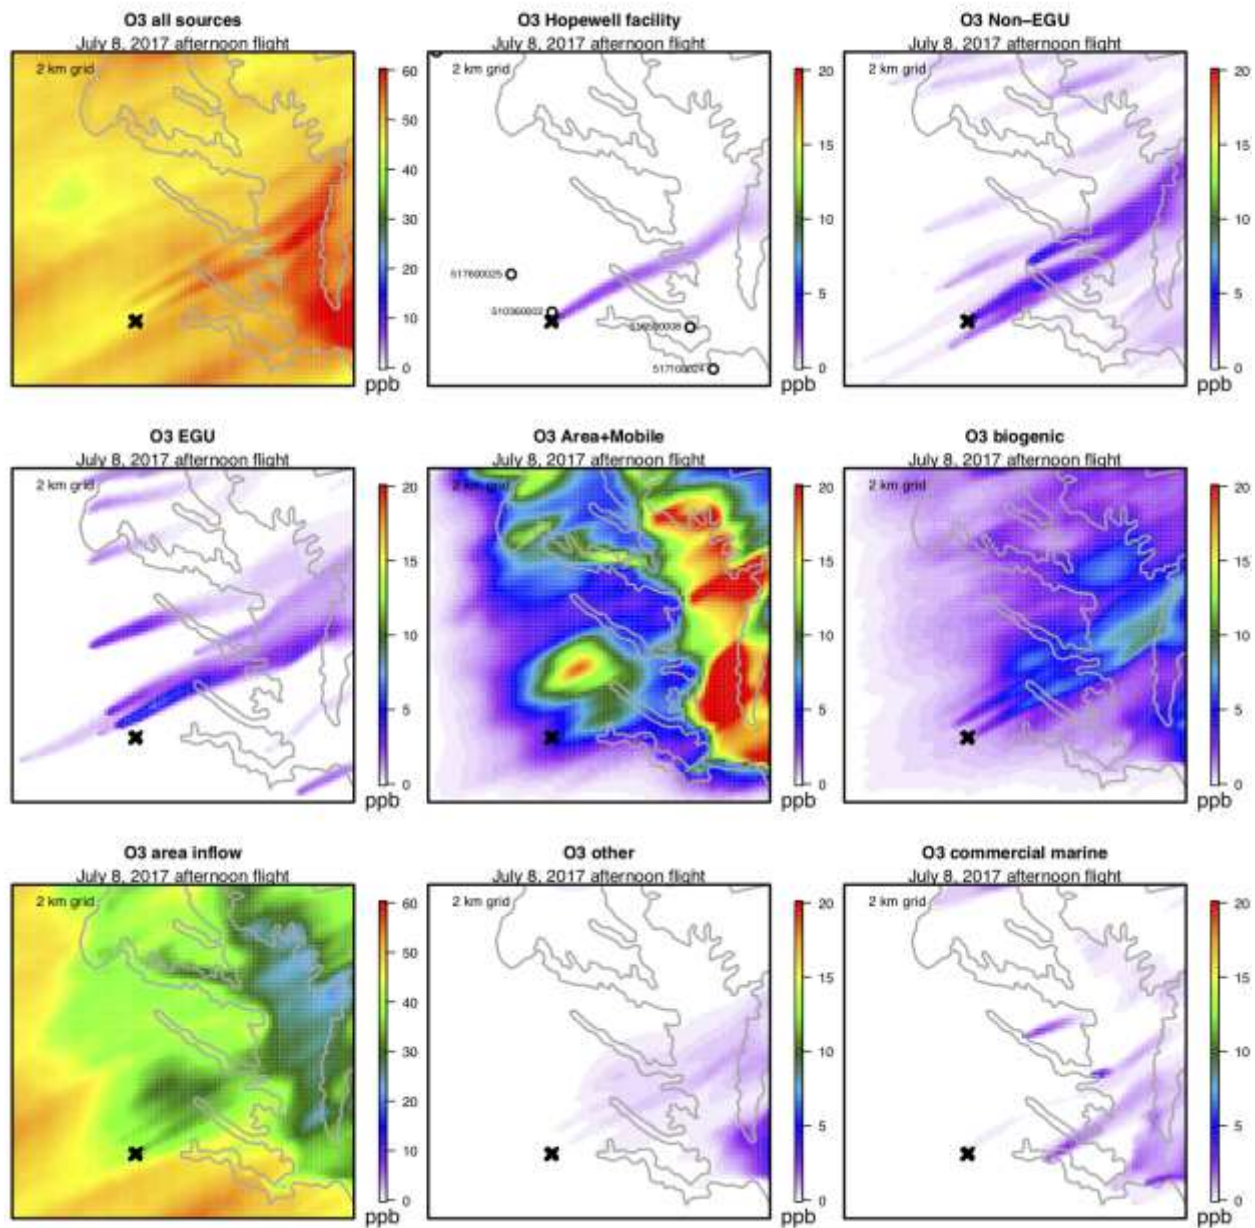

738

739

740

741 Figure S19. CMAQ 2 km (top panels) DDM model predicted surface level O<sub>3</sub> at the time of the July 8,  
742 2017 afternoon aircraft measurements. Open circles show the location of routine surface monitor sites  
743 in the area. Sensitivities based on NO<sub>x</sub> emissions only.

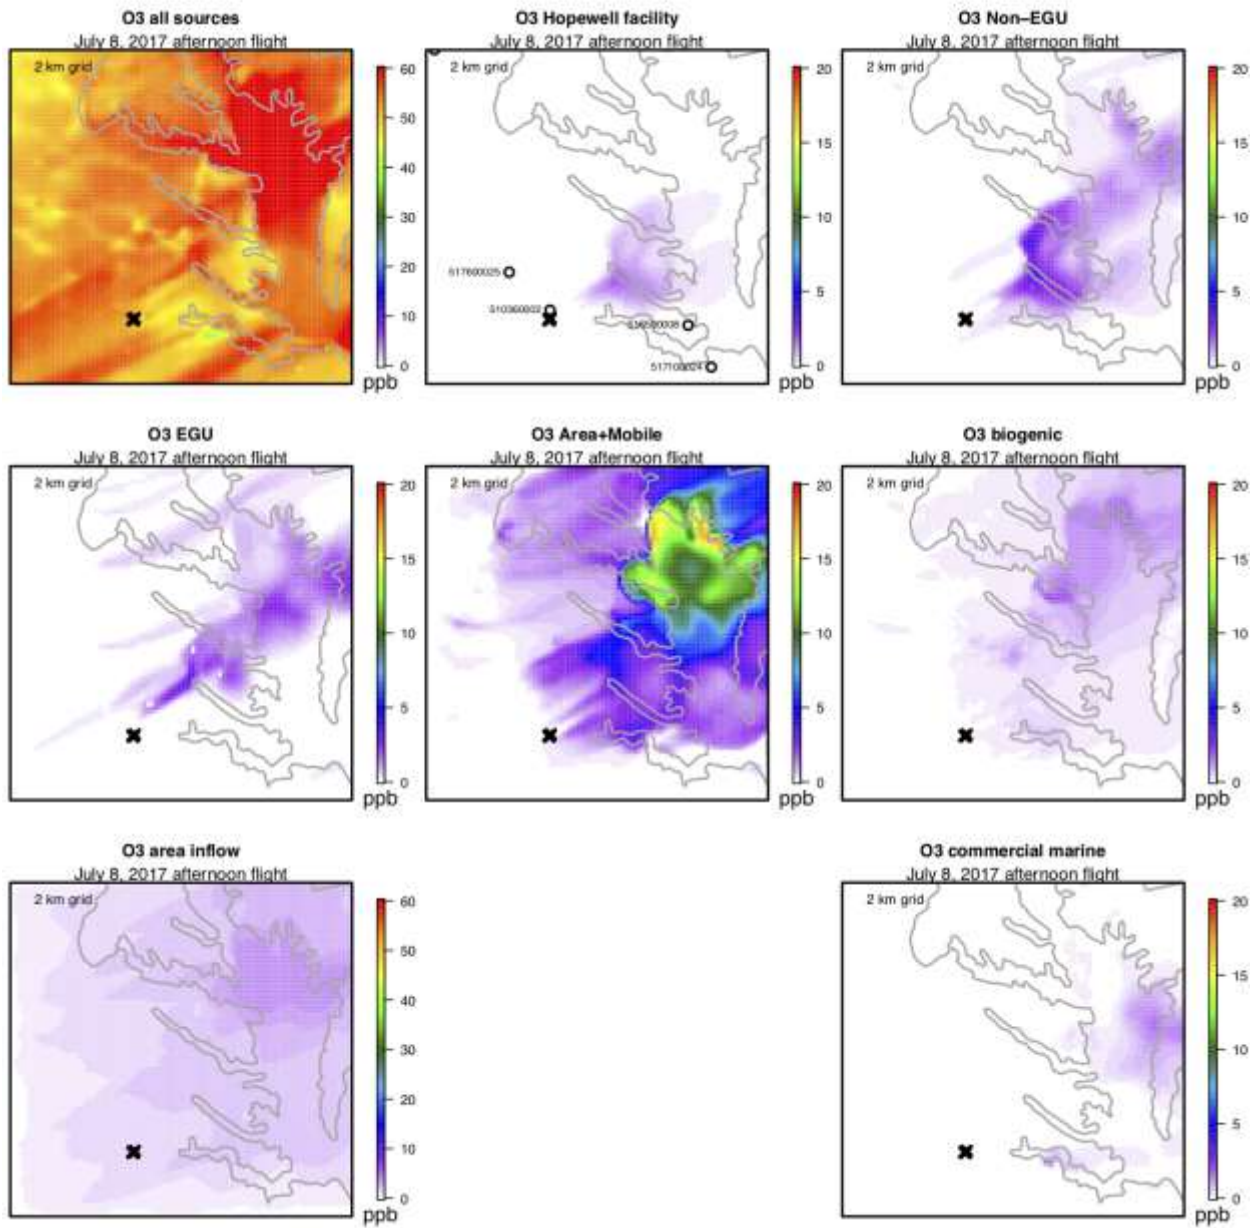

744

745

746

747 Figure S20. CMAQ 2 km (top panels) DDM model predicted surface level O<sub>3</sub> at the time of the July 8,  
748 2017 afternoon aircraft measurements. Open circles show the location of routine surface monitor sites  
749 in the area. Sensitivities based on NO<sub>x</sub> and VOC emissions. Boundary inflow also includes influence from  
750 O<sub>3</sub> in addition to NO<sub>x</sub> and VOC species.

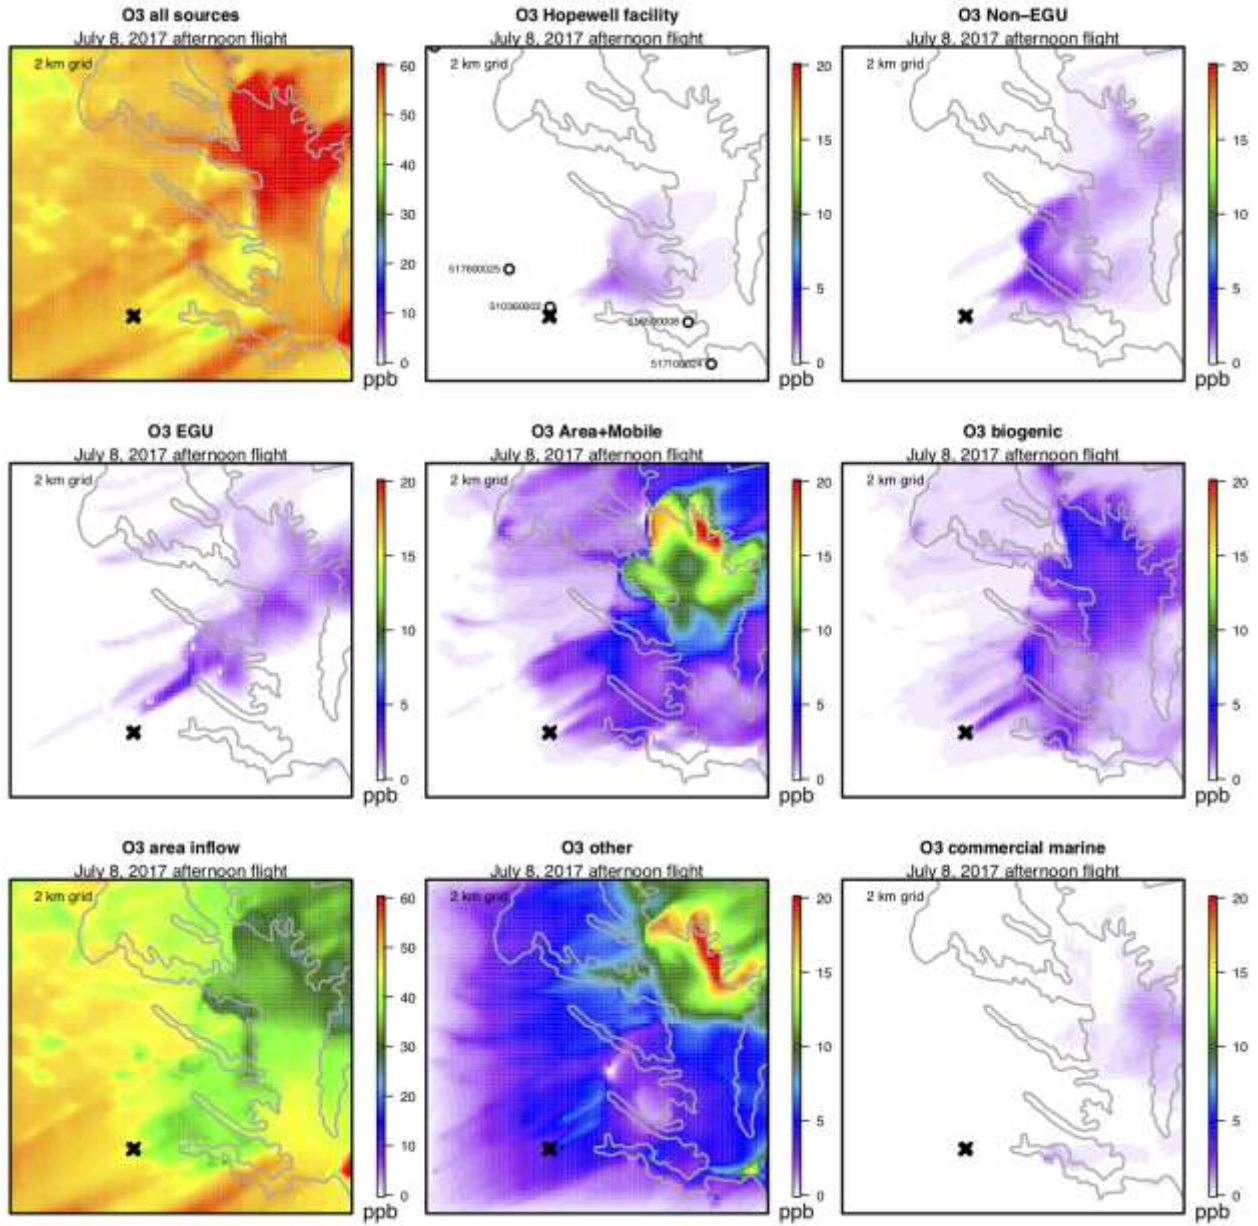

751
